# Supplementary material for: Major Cardiovascular Events After Spontaneous Intracerebral Hemorrhage by Hematoma Location
Source: PubMed Central journal article supplement (PMC10077102; doi:10.1001/jamanetworkopen.2023.5882), 2023-04-05
Supplement: jamanetwopen-e235882-s002.pdf [file jamanetwopen-e235882-s002.pdf]

## Data Sharing Statement

Boe. Major Cardiovascular Events After Spontaneous Intracerebral Hemorrhage by Hematoma Location. *JAMA Netw Open*. Published April 05, 2023.

doi:10.1001/jamanetworkopen.2023.5882

### Data

**Data available:** No

### Additional Information

**Explanation for why data not available:** Danish law prohibits the authors from sharing or granting access to the data used for this study.
